# Supplementary material for: Patterns of Leaf and Fruit Morphological Variation in Marginal Populations of Acer tataricum L. subsp. tataricum
Source: MDPI journal article supplement (doi:10.3390/plants13020320), 2024-01-21
Supplement: s1 [file s1]

Table S1: Geographic coordinates, altitudes, bioclimatic variables and number of samples for eight studied *Acer tataricum* L. subsp. *tataricum* populations. Bioclimatic variables: BIO1 (Annual Mean Temperature); BIO2 (Mean Diurnal Range (Mean of monthly (max temp—min temp))); BIO3 (Iso-thermality (BIO2/BIO7) (×100)); BIO4 (Temperature Seasonality (standard deviation ×100)); BIO5 (Max Temperature of Warmest Month); BIO6 (Min Temperature of Coldest Month); BIO7 (Temperature Annual Range (BIO5-BIO6)); BIO8 (Mean Temperature of Wettest Quarter); BIO9 (Mean Temperature of Driest Quarter); BIO10 (Mean Temperature of Warmest Quarter); BIO11 (Mean Temperature of Coldest Quarter); BIO12 (Annual Precipitation); BIO13 (Precipitation of Wettest Month); BIO14 (Precipitation of Driest Month); BIO15 (Precipitation Seasonality (Coefficient of Variation)); BIO16 (Precipitation of Wettest Quarter); BIO17 (Precipitation of Driest Quarter); BIO18 (Precipitation of Warmest Quarter); BIO19 (Precipitation of Coldest Quarter). Populations: P1–Odransko polje; P2–Lipovljani; P3–Veliki Grđevac; P4–Mali Grđevac; P5–Grubišno Polje; P6–Virovitica; P7–Požega; P8–Županja.

| Pop. | N  | Longitude | Latitude  | Altitude | Bioclimatic variables |      |      |       |      |      |      |      |     |      |     |     |     |    |      |     |     |     |     |
|------|----|-----------|-----------|----------|-----------------------|------|------|-------|------|------|------|------|-----|------|-----|-----|-----|----|------|-----|-----|-----|-----|
|      |    |           |           |          | 1                     | 2    | 3    | 4     | 5    | 6    | 7    | 8    | 9   | 10   | 11  | 12  | 13  | 14 | 15   | 16  | 17  | 18  | 19  |
| P1   | 10 | 45.550000 | 16.375278 | 99       | 11.2                  | 9.3  | 29.9 | 755.4 | 25.5 | -5.7 | 31.2 | 20.2 | 3.3 | 20.2 | 1.5 | 893 | 90  | 52 | 17.8 | 255 | 165 | 255 | 174 |
| P2   | 10 | 45.374722 | 16.829444 | 105      | 11.2                  | 10.0 | 32.3 | 731.0 | 25.5 | -5.4 | 30.9 | 20.0 | 3.6 | 20.0 | 1.9 | 918 | 93  | 54 | 16.1 | 263 | 175 | 263 | 183 |
| P3   | 15 | 45.730556 | 17.071389 | 119      | 11.1                  | 9.8  | 31.5 | 762.6 | 25.4 | -5.9 | 31.3 | 20.3 | 3.2 | 20.3 | 1.2 | 842 | 92  | 46 | 19.7 | 255 | 153 | 255 | 159 |
| P4   | 12 | 45.798056 | 17.182222 | 144      | 11.0                  | 9.5  | 31.3 | 734.7 | 24.9 | -5.6 | 30.5 | 19.8 | 3.3 | 19.8 | 1.5 | 818 | 91  | 44 | 20.8 | 252 | 146 | 252 | 154 |
| P5   | 10 | 45.707500 | 17.230556 | 136      | 11.1                  | 9.6  | 31.2 | 756.0 | 25.2 | -5.6 | 30.8 | 20.3 | 3.3 | 20.3 | 1.4 | 848 | 95  | 46 | 20.4 | 260 | 154 | 260 | 159 |
| P6   | 15 | 45.803611 | 17.366389 | 138      | 11.1                  | 8.9  | 30.3 | 744.8 | 24.6 | -4.8 | 29.4 | 20.1 | 3.4 | 20.1 | 1.6 | 797 | 92  | 42 | 22.1 | 249 | 140 | 249 | 148 |
| P7   | 10 | 45.337778 | 17.571667 | 222      | 10.9                  | 10.3 | 32.6 | 757.3 | 25.3 | -6.3 | 31.6 | 20.0 | 3.0 | 20.0 | 1.3 | 860 | 100 | 50 | 19.4 | 259 | 160 | 259 | 171 |
| P8   | 15 | 44.973611 | 18.817222 | 85       | 11.2                  | 10.3 | 32.9 | 775.3 | 25.7 | -5.6 | 31.3 | 19.2 | 3.2 | 20.6 | 1.5 | 733 | 94  | 43 | 22.7 | 234 | 135 | 234 | 147 |

Table S2: Pearson's correlation coefficients between analysed leaves' traits. Leaves' morphometric traits acronyms: leaf area (LA); leaf length (LL); maximum leaf width (MLW); leaf length, measured from the leaf base to the point of maximum leaf width (PMLW); leaf blade width at 50% (LW1) and 90% of leaf blade length (LW2); petiole length (PL); form coefficient (FC); angles enclosed by the main leaf vein (the centre of the leaf blade) and the line connecting the leaf blade base to a set point on the leaf margin, at 10% (LA10) and 25% (LA25). n.s. not significant at  $p > 0.05$ ; \* significant at  $0.01 < p < 0.05$ ; \*\* significant at  $0.001 < p < 0.01$ ; \*\*\* significant at  $p < 0.001$

|      | LA     | LL      | MLW    | PMLW    | LW1    | LW2    | PL     | FC     | LA1    | LA2  |
|------|--------|---------|--------|---------|--------|--------|--------|--------|--------|------|
| LA   |        | ***     | ***    | ***     | ***    | ***    | ***    | **     | **     | **   |
| LL   | 0.9010 |         | ***    | ***     | ***    | ***    | ***    | n.s.   | n.s.   | n.s. |
| MLW  | 0.9543 | 0.7769  |        | ***     | ***    | ***    | ***    | ***    | ***    | ***  |
| PMLW | 0.7224 | 0.7436  | 0.6903 |         | ***    | ***    | ***    | n.s.   | n.s.   | n.s. |
| LW1  | 0.9192 | 0.7193  | 0.9541 | 0.7535  |        | ***    | ***    | ***    | ***    | ***  |
| LW2  | 0.7560 | 0.5276  | 0.7266 | 0.4884  | 0.7782 |        | ***    | ***    | ***    | ***  |
| PL   | 0.7914 | 0.6631  | 0.7883 | 0.4503  | 0.6915 | 0.6290 |        | ***    | ***    | ***  |
| FC   | 0.3375 | 0.0785  | 0.3558 | -0.0397 | 0.3610 | 0.5438 | 0.4260 |        | ***    | ***  |
| LA1  | 0.3021 | -0.0774 | 0.4835 | -0.1018 | 0.4456 | 0.3871 | 0.4340 | 0.5504 |        | ***  |
| LA2  | 0.3253 | -0.0748 | 0.5428 | -0.0223 | 0.5037 | 0.4276 | 0.4437 | 0.5655 | 0.9402 |      |

Table S3: Pearson's correlation coefficients between analysed fruit traits. Fruit morphometric traits acronyms: mericarp area (MA); mericarp length (ML); maximum mericarp width (MMW); length of the mericarp, measured from the basis to the point of maximum width (PMMW); width of mericarp at 90% of mericarp's length (MW90); nut length (NL); nut width (NW); angle enclosed by the wings (WA). n.s. not significant at  $p > 0.05$ ; \* significant at  $0.01 < p < 0.05$ ; \*\* significant at  $0.001 < p < 0.01$ ; \*\*\* significant at  $p < 0.001$ .

|      | MA     | ML     | MMW    | PMMW   | MW90   | NL     | NW     | WA  |
|------|--------|--------|--------|--------|--------|--------|--------|-----|
| MA   |        | ***    | ***    | ***    | ***    | ***    | **     | n.s |
| ML   | 0.882  |        | ***    | ***    | ***    | ***    | ***    | n.s |
| MMW  | 0.935  | 0.702  |        | ***    | ***    | ***    | *      | n.s |
| PMMW | 0.754  | 0.908  | 0.585  |        | ***    | ***    | ***    | n.s |
| MW90 | 0.831  | 0.596  | 0.893  | 0.633  |        | ***    | **     | n.s |
| NL   | 0.618  | 0.698  | 0.505  | 0.686  | 0.491  |        | ***    | n.s |
| NW   | 0.323  | 0.420  | 0.249  | 0.503  | 0.321  | 0.637  |        | n.s |
| WA   | -0.065 | -0.073 | -0.053 | -0.021 | -0.018 | -0.081 | -0.058 |     |

Table S4: Pearson's correlation coefficients between analysed leaves and fruit traits. Leaves' morphometric traits acronyms: leaf area (LA); leaf length (LL); maximum leaf width (MLW); leaf length, measured from the leaf base to the point of maximum leaf width (PMLW); leaf blade width at 50% (LW1) and 90% of leaf blade length (LW2); petiole length (PL); form coefficient (FC); angles enclosed by the main leaf vein (the centre of the leaf blade) and the line connecting the leaf blade base to a set point on the leaf margin, at 10% (LA10) and 25% (LA25). Fruit morphometric traits acronyms: mericarp area (MA); mericarp length (ML); maximum mericarp width (MMW); length of the mericarp, measured from the basis to the point of maximum width (PMMW); width of the mericarp at 90% of the mericarp's length (MW90); nut length (NL); nut width (NW); angle enclosed by the wings (WA). n.s. not significant at  $p > 0.05$ ; \* significant at  $0.01 < p < 0.05$ ; \*\* significant at  $0.001 < p < 0.01$ ; \*\*\* significant at  $p < 0.001$ .

|      | LA                    | LL                    | MLW                   | PMLW                  | LW1                   | LW2                   | PL                    | FC                    | LA1                    | LA2                   |
|------|-----------------------|-----------------------|-----------------------|-----------------------|-----------------------|-----------------------|-----------------------|-----------------------|------------------------|-----------------------|
| MA   | 0.274**               | 0.249*                | 0.229*                | 0.139 <sup>n.s.</sup> | 0.252*                | 0.237*                | 0.218*                | 0.249*                | 0.027 <sup>n.s.</sup>  | 0.063 <sup>n.s.</sup> |
| ML   | 0.337**               | 0.300**               | 0.289**               | 0.258*                | 0.342**               | 0.306**               | 0.268**               | 0.292**               | 0.038 <sup>n.s.</sup>  | 0.082 <sup>n.s.</sup> |
| MMW  | 0.190 <sup>n.s.</sup> | 0.169 <sup>n.s.</sup> | 0.166 <sup>n.s.</sup> | 0.062 <sup>n.s.</sup> | 0.179 <sup>n.s.</sup> | 0.150 <sup>n.s.</sup> | 0.128 <sup>n.s.</sup> | 0.160 <sup>n.s.</sup> | 0.014 <sup>n.s.</sup>  | 0.055 <sup>n.s.</sup> |
| PMMW | 0.338**               | 0.325**               | 0.301**               | 0.302**               | 0.340**               | 0.250*                | 0.252*                | 0.288**               | -0.005 <sup>n.s.</sup> | 0.063 <sup>n.s.</sup> |
| MW90 | 0.206*                | 0.205*                | 0.189 <sup>n.s.</sup> | 0.097 <sup>n.s.</sup> | 0.174 <sup>n.s.</sup> | 0.097 <sup>n.s.</sup> | 0.136 <sup>n.s.</sup> | 0.172 <sup>n.s.</sup> | -0.004 <sup>n.s.</sup> | 0.049 <sup>n.s.</sup> |
| NL   | 0.384***              | 0.366***              | 0.303**               | 0.226*                | 0.349**               | 0.374***              | 0.263*                | 0.340**               | 0.023 <sup>n.s.</sup>  | 0.047 <sup>n.s.</sup> |
| NW   | 0.190 <sup>n.s.</sup> | 0.172 <sup>n.s.</sup> | 0.164 <sup>n.s.</sup> | 0.070 <sup>n.s.</sup> | 0.168 <sup>n.s.</sup> | 0.130 <sup>n.s.</sup> | 0.036 <sup>n.s.</sup> | 0.188 <sup>n.s.</sup> | 0.060 <sup>n.s.</sup>  | 0.079 <sup>n.s.</sup> |
| WA   | 0.117 <sup>n.s.</sup> | 0.087 <sup>n.s.</sup> | 0.134 <sup>n.s.</sup> | 0.112 <sup>n.s.</sup> | 0.159 <sup>n.s.</sup> | 0.093 <sup>n.s.</sup> | 0.127 <sup>n.s.</sup> | 0.021 <sup>n.s.</sup> | 0.096 <sup>n.s.</sup>  | 0.067 <sup>n.s.</sup> |
